# Supplementary material for: Super-Ballistic Width Dependence of Thermal Conductivity in Graphite Nanoribbons and Microribbons
Source: MDPI journal article supplement (doi:10.3390/nano13121854), 2023-06-13
Supplement: s1 [file s1]

# Super-Ballistic Width Dependence of Thermal Conductivity in Graphite Nanoribbons and Microribbons

Xin Huang<sup>1,\*</sup>, Satoru Masubuchi<sup>1</sup>, Kenji Watanabe<sup>2</sup>, Takashi Taniguchi<sup>1,3</sup>, Tomoki Machida<sup>1</sup>  
and Masahiro Nomura<sup>1,\*</sup>

<sup>1</sup> Institute of Industrial Science, The University of Tokyo, Tokyo 153-8505, Japan

<sup>2</sup> Research Center for Electronic and Optical Materials, National Institute for Materials Science, 1-1 Namiki, Tsukuba 305-0044, Japan

<sup>3</sup> Research Center for Materials Nanoarchitectonics, National Institute for Materials Science, 1-1 Namiki, Tsukuba 305-0044, Japan

\* Correspondence: huangxin@iis.u-tokyo.ac.jp (X.H.); nomura@iis.u-tokyo.ac.jp (M.N.)

## Characterization of the roughness and width of the structures

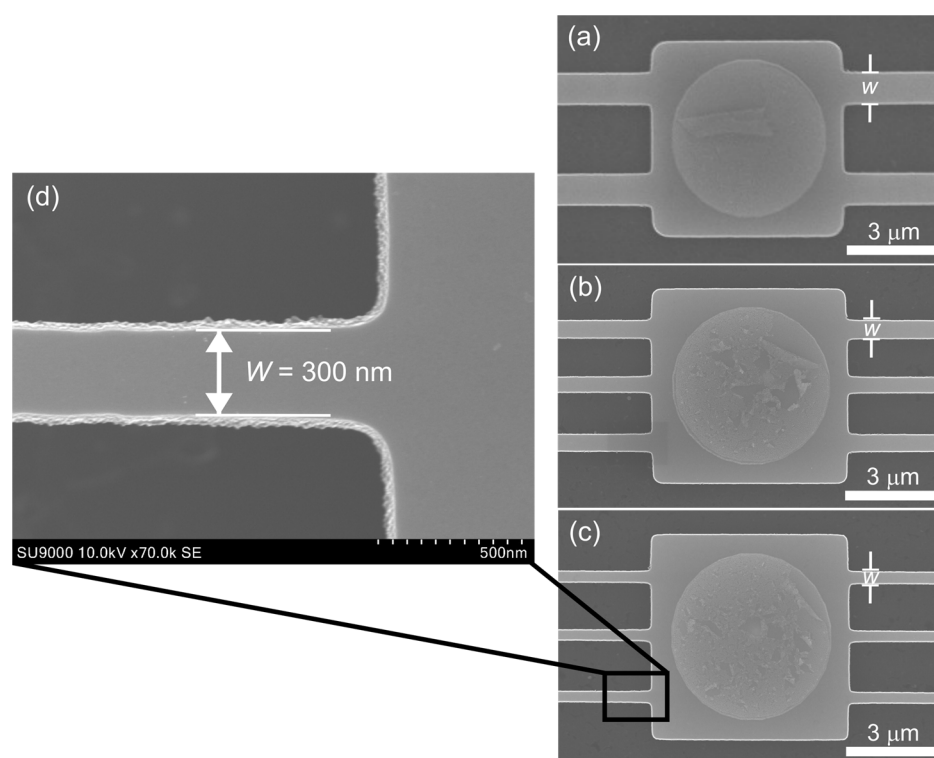

**Figure S1.** Scanning electron microscope (SEM) image of suspended graphite ribbons with the width ( $W$ ) of (a) 1.2 mm, (b) 600 nm, and (c-d) 300 nm.
